# Supplementary material for: A high-performance lithiated silicon–sulfur battery enabled by fluorinated ether electrolytes
Source: Royal Society of Chemistry journal article supplement (doi:10.1039/d1ta05734k), 2021-01-01
Supplement: d1ta05734k1.pdf [file d1ta05734k1.pdf]

## Supplementary Information

### A High-Performance Lithiated Silicon-Sulfur Battery Enabled by Fluorinated

#### Ether Electrolytes

Leicheng Zhang<sup>a,b</sup>, Chen Zhao<sup>a,b</sup>, Yanke Lin<sup>a,b</sup>, Maochun Wu<sup>a,b,\*</sup>, Tianshou Zhao<sup>a,b,\*</sup>

<sup>a</sup>Department of Mechanical and Aerospace Engineering, The Hong Kong University of Science and Technology, Clear Water Bay, Kowloon, Hong Kong SAR, China

<sup>b</sup> HKUST Energy Institute, The Hong Kong University of Science and Technology, Clear Water Bay, Kowloon, Hong Kong SAR, China

\* Corresponding authors:

Tel.: (852) 3469 2293 E-mail: mwuah@connect.ust.hk (M.C. Wu)

Tel.: (852) 2358 8647 E-mail: metzhao@ust.hk (T.S. Zhao)

## **Material characterizations**

The morphology of samples was observed by scanning electron microscopy (SEM) conducted on a JOEL-6700 SEM instrument at an accelerating voltage of 10 kV, and transmission electron microscopy (TEM) on a JEOL-2010 TEM instrument at 200 kV equipped with energy-dispersive X-ray spectroscopy (EDS). Thermogravimetric analysis (TGA) was measured with a TGA Q5000 (TA) instrument in a temperature range between 25-500 °C in N<sub>2</sub> with a heating rate of 2 °C min<sup>-1</sup>. X-ray photoelectron spectroscopy (XPS) was conducted on a Physical Electronics PHI 5600 multi-technique system using an Al monochromatic X-ray source at 350 W. The time-of-flight secondary-ion mass spectrometry (ToF-SIMS) was carried out on a TOF SIMS V (ION-TOF GmbH) instrument equipped with a bismuth liquid-metal ion source for analysis and a Cs<sup>+</sup> ion beam for sputtering.

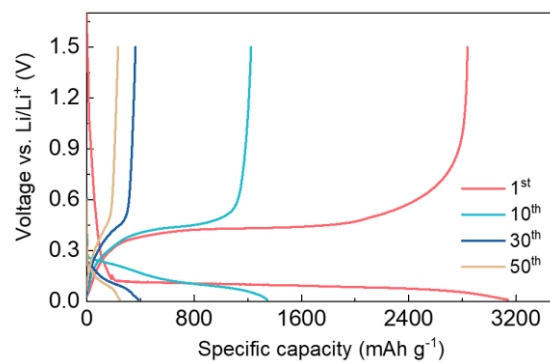

**Fig. S1.** Representative voltage profiles of SiMP electrodes using DME/DOL.

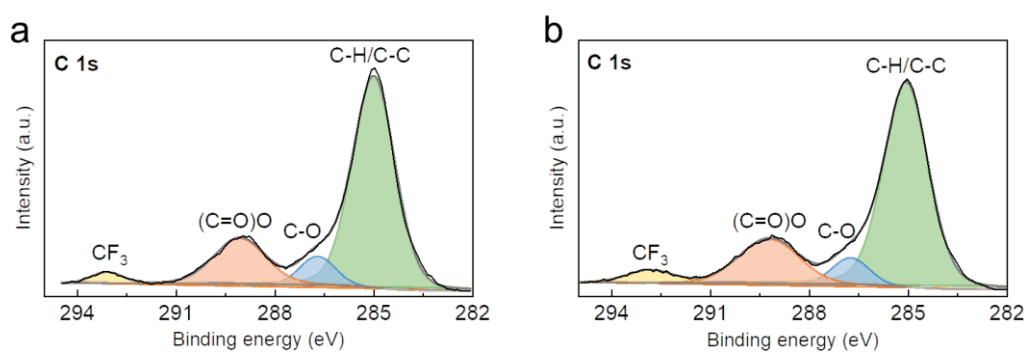

**Fig. S2.** C 1s spectra of SiMP electrode surface in (a) DME/DOL and (b) HFE/DOL.

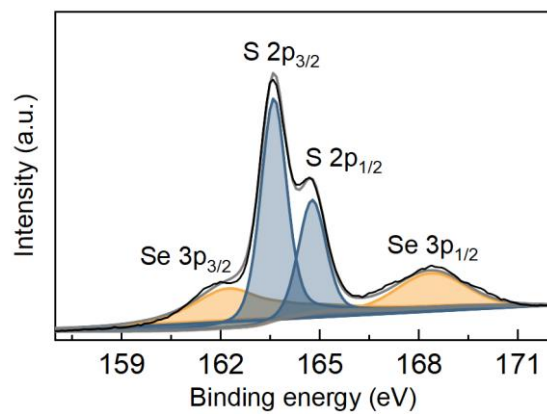

**Fig. S3.** S 2p and Se 3p spectra of Se/S@HCS composite.

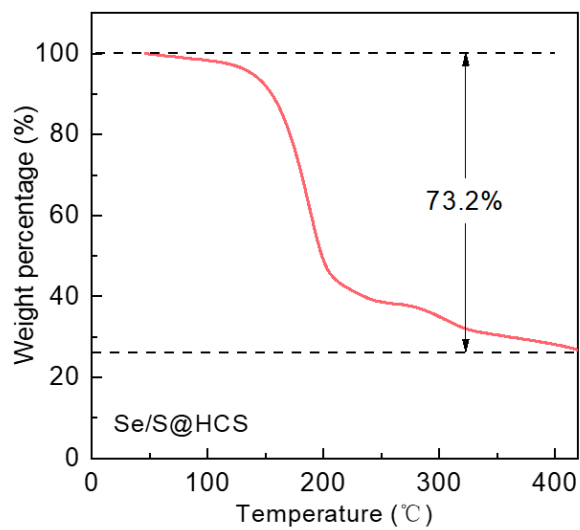

**Fig. S4.** TGA curve of Se/S@HCS composite.

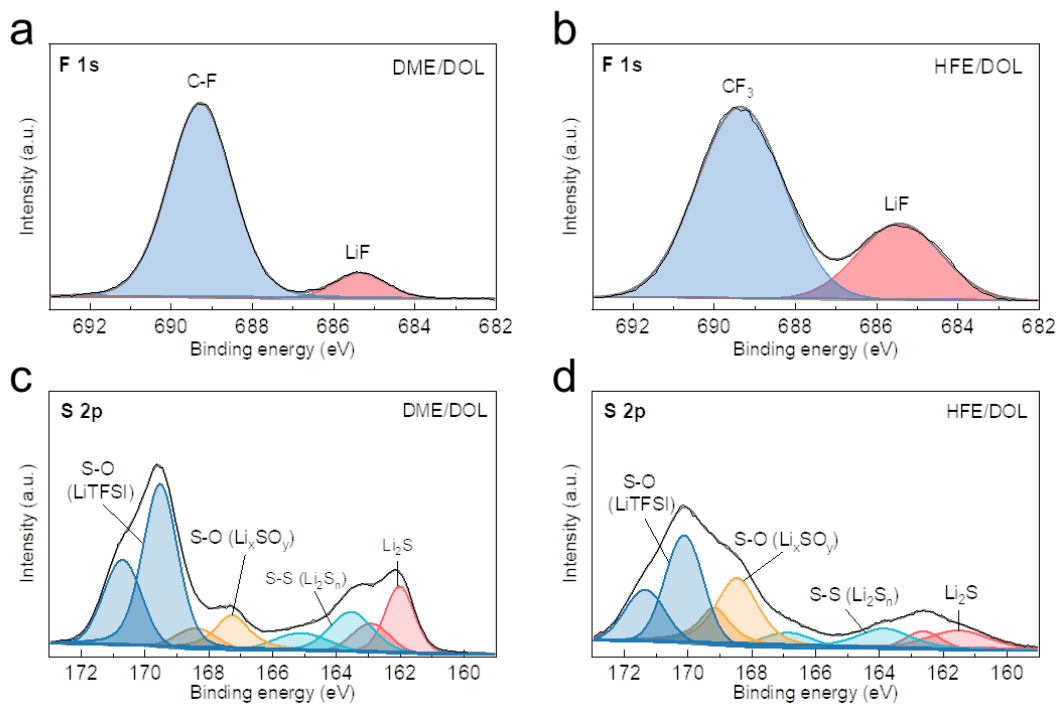

**Fig. S5.** F 1s spectra of cycled Se/S cathode using (a) DME/DOL and (b) HFE/DOL. S 2p spectra of (c) DME/DOL and (d) HFE/DOL.

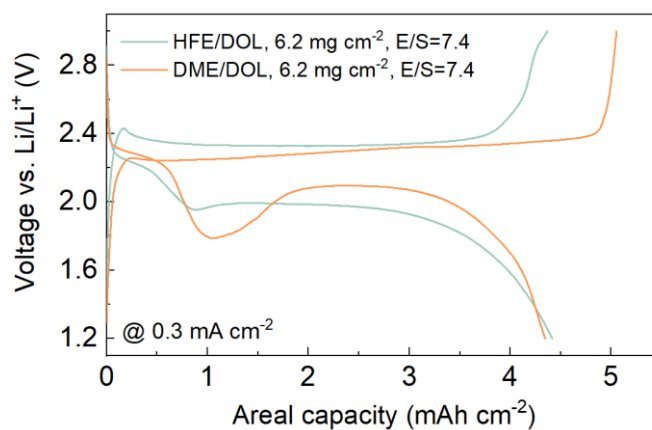

**Fig. S6.** Initial voltage profiles of Li-Se/S@HCS half cell at 0.3 mA cm<sup>-2</sup> under high loading and lean electrolyte conditions.

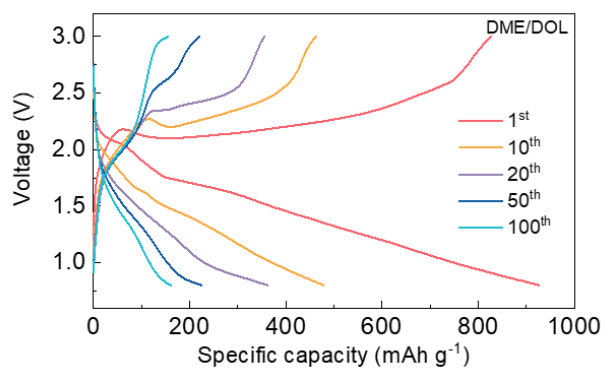

**Fig. S7.** Representative voltage profiles of lithiated SiMP-Se/S full cell using DME/DOL.
